# Supplementary material for: WDR5 Expression Is Prognostic of Breast Cancer Outcome
Source: PubMed Central journal article supplement (PMC4565643; doi:10.1371/journal.pone.0124964), 2015-09-10

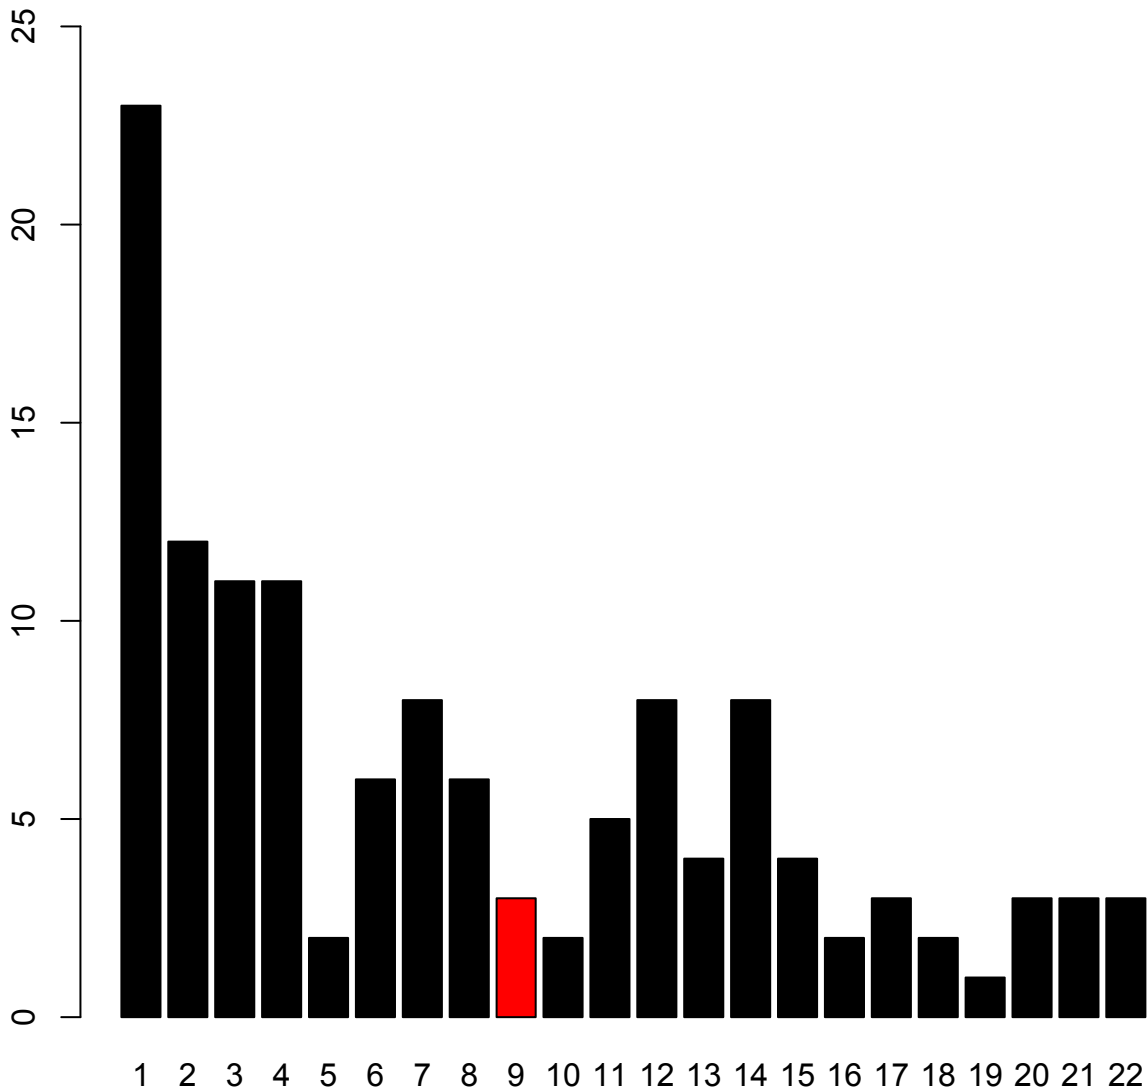

Supplement: pone.0124964.s004.pdf [file pone.0124964.s004.pdf]
