# Supplementary material for: WDR5 Expression Is Prognostic of Breast Cancer Outcome
Source: PLoS One. 2015 Sep 10;10(9):e0124964. doi: 10.1371/journal.pone.0124964 (PMC4565643; doi:10.1371/journal.pone.0124964)
Supplement: S3 Table — 'Negative Concentration' shows the concentration at which negative Z factor is observed. (XLSX) [file pone.0124964.s010.xlsx]

## Sheet: Table S3
Plate	NegControlType	Company	Z factor	Concentration	Cell line	NegCon
3	Neg	Ambion	0.605458	0.83, 10, 25, 100nM	MCF7
3	Neg+c1	Ambion	0.487074	0.83, 10, 25, 100nM	MCF7
3	Neg+c2	Ambion	0.496441	0.83, 10, 25, 100nM	MCF7
3	Neg+c3	Ambion	0.599439	0.83, 10, 25, 100nM	MCF7
3	Neg+c4	Ambion	0.401617	0.83, 10, 25, 100nM	MCF7
3	Neg	Qiagen	0.583703	0.83, 10, 25, 100nM	MCF7
3	Neg+c1	Qiagen	0.526088	0.83, 10, 25, 100nM	MCF7
3	Neg+c2	Qiagen	0.419552	0.83, 10, 25, 100nM	MCF7
3	Neg+c3	Qiagen	0.475622	0.83, 10, 25, 100nM	MCF7
3	Neg+c4	Qiagen	0.33442	0.83, 10, 25, 100nM	MCF7
4	Neg	Ambion	0.638556	250, 1000, 2500, 10000nM	MCF7
4	Neg+c1	Ambion	0.423354	250, 1000, 2500, 10000nM	MCF7
4	Neg+c2	Ambion	0.101078	250, 1000, 2500, 10000nM	MCF7
4	Neg+c3	Ambion	0.384859	250, 1000, 2500, 10000nM	MCF7
4	Neg+c4	Ambion	0.439619	250, 1000, 2500, 10000nM	MCF7
4	Neg	Qiagen	0.521784	250, 1000, 2500, 10000nM	MCF7
4	Neg+c1	Qiagen	0.342794	250, 1000, 2500, 10000nM	MCF7
4	Neg+c2	Qiagen	-0.861339	250, 1000, 2500, 10000nM	MCF7	1000
4	Neg+c3	Qiagen	0.161493	250, 1000, 2500, 10000nM	MCF7
4	Neg+c4	Qiagen	0.191578	250, 1000, 2500, 10000nM	MCF7
7	Neg	Ambion	0.675826	0.83, 10, 25, 100nM	MDA231
7	Neg+c1	Ambion	0.721893	0.83, 10, 25, 100nM	MDA231
7	Neg+c2	Ambion	0.775306	0.83, 10, 25, 100nM	MDA231
7	Neg+c3	Ambion	0.636174	0.83, 10, 25, 100nM	MDA231
7	Neg+c4	Ambion	0.634881	0.83, 10, 25, 100nM	MDA231
7	Neg	Qiagen	0.6958	0.83, 10, 25, 100nM	MDA231
7	Neg+c1	Qiagen	0.771723	0.83, 10, 25, 100nM	MDA231
7	Neg+c2	Qiagen	0.727088	0.83, 10, 25, 100nM	MDA231
7	Neg+c3	Qiagen	0.685626	0.83, 10, 25, 100nM	MDA231
7	Neg+c4	Qiagen	0.713094	0.83, 10, 25, 100nM	MDA231
8	Neg	Ambion	0.72677	250, 1000, 2500, 10000nM	MDA231
8	Neg+c1	Ambion	0.485933	250, 1000, 2500, 10000nM	MDA231
8	Neg+c2	Ambion	-0.392739	250, 1000, 2500, 10000nM	MDA231	1000
8	Neg+c3	Ambion	-0.908773	250, 1000, 2500, 10000nM	MDA231	2500
8	Neg+c4	Ambion	-3.39915	250, 1000, 2500, 10000nM	MDA231	10000
8	Neg	Qiagen	0.767226	250, 1000, 2500, 10000nM	MDA231
8	Neg+c1	Qiagen	0.628247	250, 1000, 2500, 10000nM	MDA231
8	Neg+c2	Qiagen	0.321235	250, 1000, 2500, 10000nM	MDA231
8	Neg+c3	Qiagen	-1.22815	250, 1000, 2500, 10000nM	MDA231	2500
8	Neg+c4	Qiagen	-38.456	250, 1000, 2500, 10000nM	MDA231	10000
11	Neg	Ambion	0.492348	0.83, 10, 25, 100nM	MDA361
11	Neg+c1	Ambion	0.444137	0.83, 10, 25, 100nM	MDA361
11	Neg+c2	Ambion	0.705275	0.83, 10, 25, 100nM	MDA361
11	Neg+c3	Ambion	0.563855	0.83, 10, 25, 100nM	MDA361
11	Neg+c4	Ambion	0.64269	0.83, 10, 25, 100nM	MDA361
11	Neg	Qiagen	0.486545	0.83, 10, 25, 100nM	MDA361
11	Neg+c1	Qiagen	0.750414	0.83, 10, 25, 100nM	MDA361
11	Neg+c2	Qiagen	0.567724	0.83, 10, 25, 100nM	MDA361
11	Neg+c3	Qiagen	0.627398	0.83, 10, 25, 100nM	MDA361
11	Neg+c4	Qiagen	0.602901	0.83, 10, 25, 100nM	MDA361
12	Neg	Ambion	0.521526	250, 1000, 2500, 10000nM	MDA361
12	Neg+c1	Ambion	0.635323	250, 1000, 2500, 10000nM	MDA361
12	Neg+c2	Ambion	-0.944252	250, 1000, 2500, 10000nM	MDA361	1000
12	Neg+c3	Ambion	0.489175	250, 1000, 2500, 10000nM	MDA361
12	Neg+c4	Ambion	0.462826	250, 1000, 2500, 10000nM	MDA361
12	Neg	Qiagen	0.491391	250, 1000, 2500, 10000nM	MDA361
12	Neg+c1	Qiagen	0.601853	250, 1000, 2500, 10000nM	MDA361
12	Neg+c2	Qiagen	-0.408988	250, 1000, 2500, 10000nM	MDA361	1000
12	Neg+c3	Qiagen	0.576655	250, 1000, 2500, 10000nM	MDA361
12	Neg+c4	Qiagen	0.367243	250, 1000, 2500, 10000nM	MDA361
15	Neg	Ambion	0.619543	0.83, 10, 25, 100nM	HCC1937
15	Neg+c1	Ambion	0.635448	0.83, 10, 25, 100nM	HCC1937
15	Neg+c2	Ambion	0.673842	0.83, 10, 25, 100nM	HCC1937
15	Neg+c3	Ambion	0.631877	0.83, 10, 25, 100nM	HCC1937
15	Neg+c4	Ambion	0.389983	0.83, 10, 25, 100nM	HCC1937
15	Neg	Qiagen	0.502554	0.83, 10, 25, 100nM	HCC1937
15	Neg+c1	Qiagen	0.6085	0.83, 10, 25, 100nM	HCC1937
15	Neg+c2	Qiagen	0.712137	0.83, 10, 25, 100nM	HCC1937
15	Neg+c3	Qiagen	0.677586	0.83, 10, 25, 100nM	HCC1937
15	Neg+c4	Qiagen	0.63436	0.83, 10, 25, 100nM	HCC1937
16	Neg	Ambion	0.586231	250, 1000, 2500, 10000nM	HCC1937
16	Neg+c1	Ambion	0.591749	250, 1000, 2500, 10000nM	HCC1937
16	Neg+c2	Ambion	-0.0173291	250, 1000, 2500, 10000nM	HCC1937	1000
16	Neg+c3	Ambion	0.505704	250, 1000, 2500, 10000nM	HCC1937
16	Neg+c4	Ambion	0.47312	250, 1000, 2500, 10000nM	HCC1937
16	Neg	Qiagen	0.607335	250, 1000, 2500, 10000nM	HCC1937
16	Neg+c1	Qiagen	0.651183	250, 1000, 2500, 10000nM	HCC1937
16	Neg+c2	Qiagen	0.0142982	250, 1000, 2500, 10000nM	HCC1937
16	Neg+c3	Qiagen	0.214959	250, 1000, 2500, 10000nM	HCC1937
16	Neg+c4	Qiagen	0.333569	250, 1000, 2500, 10000nM	HCC1937
